# Supplementary material for: Template-free synthesis of mesoporous anatase titania hollow spheres and their enhanced photocatalysis
Source: Royal Society of Chemistry journal article supplement (doi:10.1039/c4ce02358g), 2015-01-01
Supplement: c4ce02358g1.pdf [file c4ce02358g1.pdf]

## Supporting Information

### **Template-free Synthesis of Mesoporous Anatase Titania Hollow Spheres and Their Enhanced Photocatalysis**

Changchao Jia,<sup>a</sup> Ping Yang,<sup>\*a</sup> Hsueh-Shih Chen,<sup>b</sup> Junpeng Wang<sup>a</sup>

*<sup>a</sup>School of Materials Science and Engineering, University of Jinan, Jinan, 250022, P.R. China*

*<sup>b</sup>Department of Materials Science and Engineering, National Tsing Hua University, Hsinchu 300, Taiwan*

*\*Corresponding author e-mail: E-mail: mse\_yangp@ujn.edu.cn*

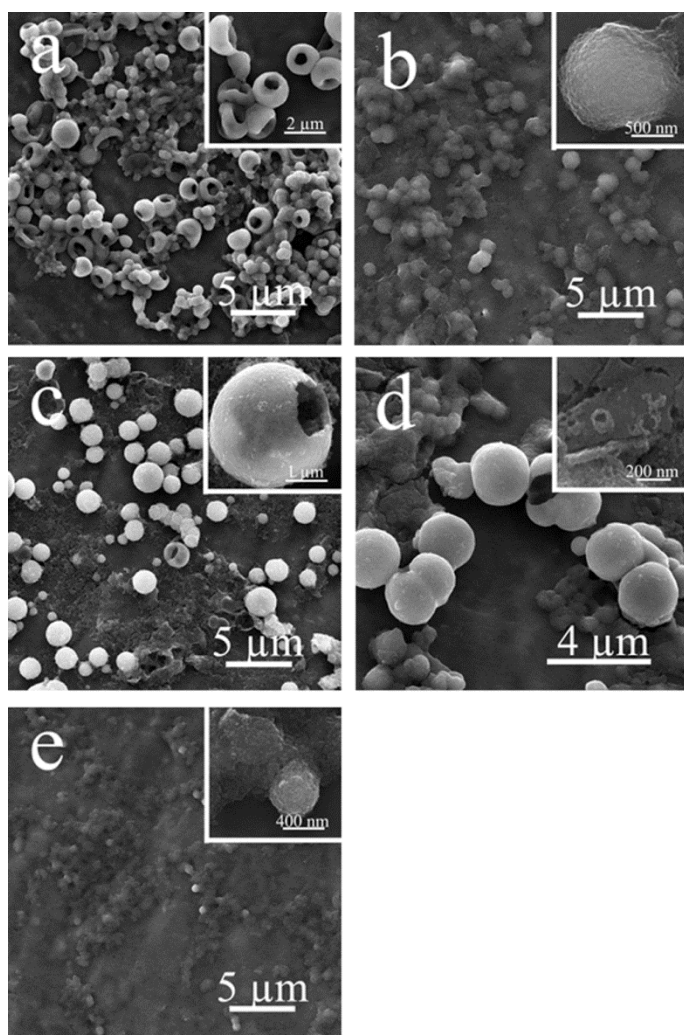

**Figure S1.** SEM images of TiO<sub>2</sub> spheres prepared under different reaction conditions: a), using TGA and TBT in a reverse order (sample 15); b), in the absence of TGA (sample 16); c), in the absence of H<sub>2</sub>O (sample 17); d), TAA instead of TGA (sample 18); e), acetic acid instead of TGA (sample 19).

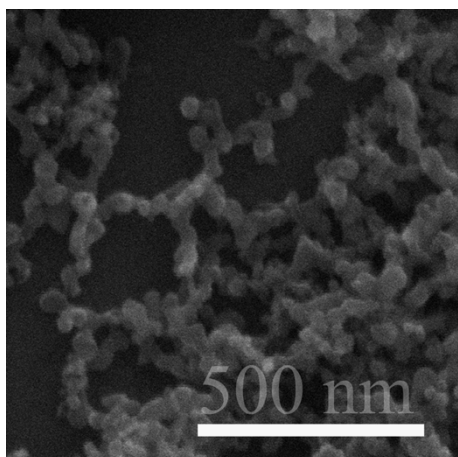

**Figure S2.** SEM image of loose reticular structure of nanoparticles (Ti-oxo molecular clusters).

**Debye–Scherrer equation:**  $D = K\lambda / \beta \cos \theta$ , where  $\lambda$  is the wavelength of the Cu  $K\alpha$  radiation ( $\lambda = 0.15406$  nm),  $K$  is the Scherrer constant ( $K = 0.9$ ),  $\beta$  is the full width at half-maximum (fwhm) of the (101) plane for anatase  $\text{TiO}_2$ , and  $\theta$  is the position of XRD peak ( $2\theta = 25.281^\circ$ ).
